# Supplementary material for: Patterned nanofiber air filters with high optical transparency, robust mechanical strength, and effective PM2.5 capture capability
Source: Royal Society of Chemistry journal article supplement (doi:10.1039/d0ra01967d), 2020-01-01
Supplement: d0ra01967d1.pdf [file d0ra01967d1.pdf]

Electronic Supporting Information (ESI) for

**Patterned nanofiber air filters with high optical transparency, robust  
mechanical strength, and effective PM<sub>2.5</sub> capture capability**

Jinshan Cao,<sup>a</sup> Zhiqiang Cheng,<sup>\*a</sup> Lijuan Kang,<sup>a</sup> Meng Lin<sup>b</sup> and Lihao Han<sup>\*b</sup>

<sup>a</sup>College of Resources and Environment, Jilin Agricultural University, Changchun  
130118, People Republic China. E-mail: cjs4451@126.com

<sup>b</sup>Joint Center for Artificial Photosynthesis (JCAP), California Institute of Technology  
(CALTECH), Pasadena CA, United States. E-mail: hanlihao@caltech.edu

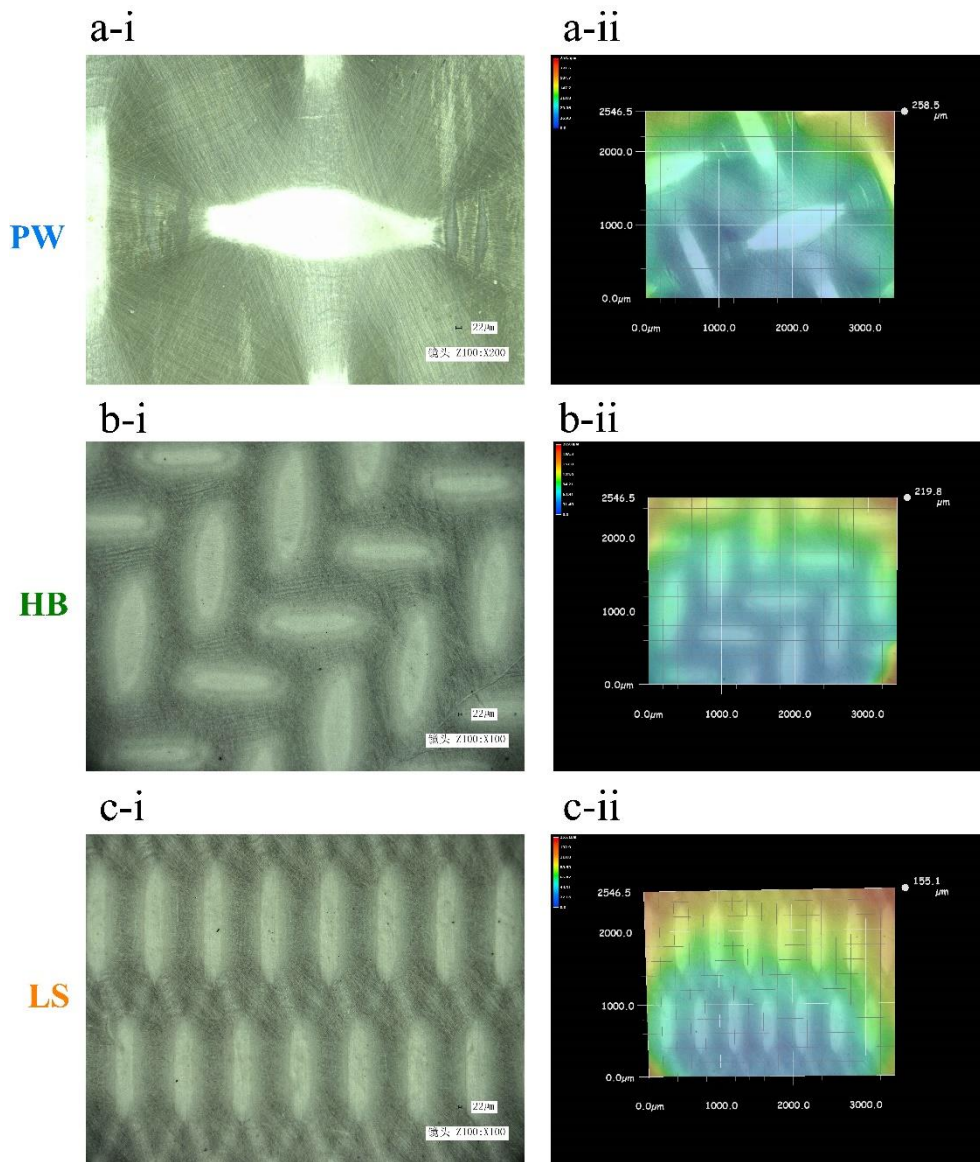

**Figure S1.** (i) Photomicrograph and (ii) The height distribution map for the surface of three patterned nanofibrous membranes. (a) PW NFs, (b) HB NFs and (c) LS NFs.

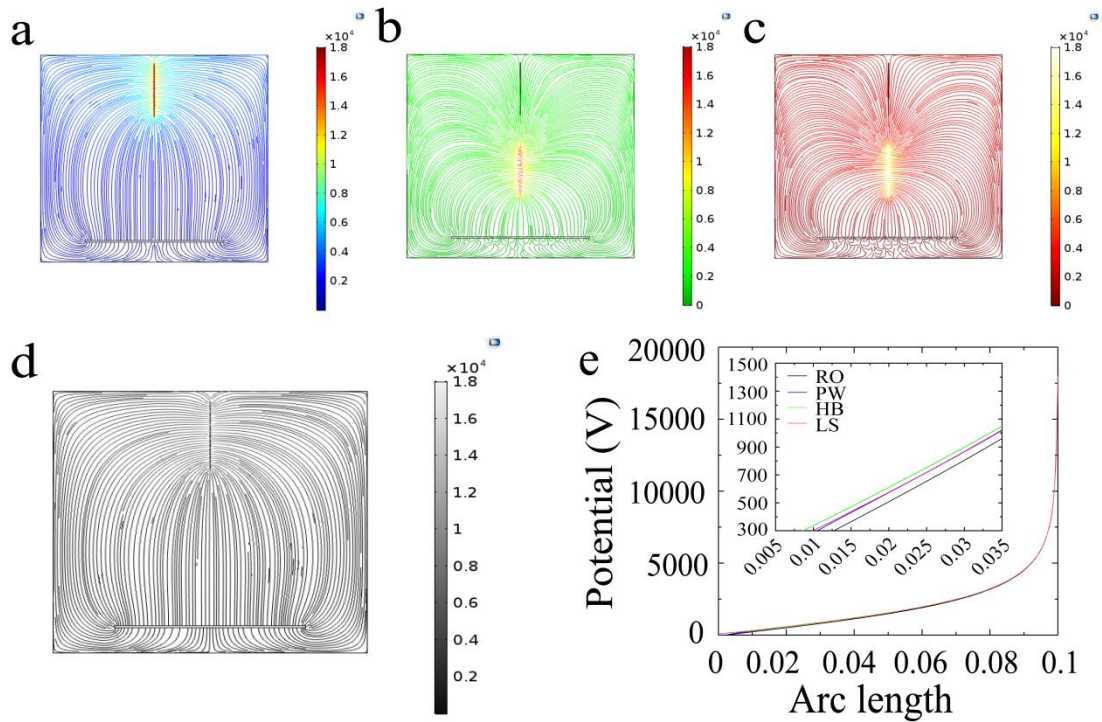

**Figure S2.** Electric field simulation for the formation process of patterned nanofibrous membranes: (a) PW NFs, (b) HB NFs, (c) LS NFs and (d) RO NFs, metal-needle-to-collector distance of 30 cm, and applied voltage of 19 kV. (e) The corresponding distribution of potential.

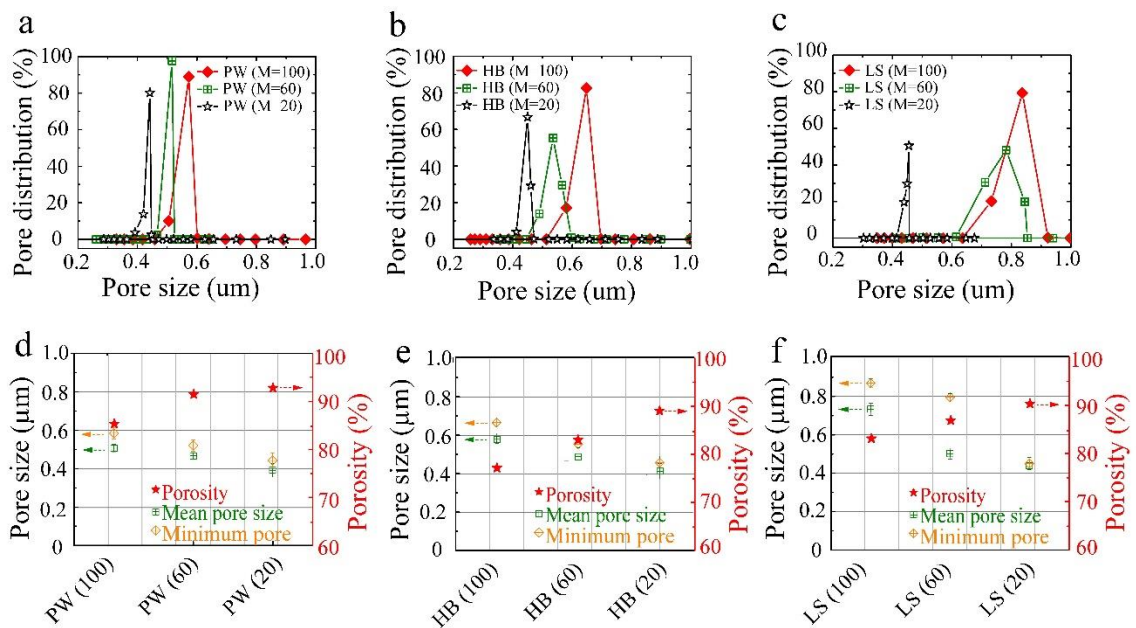

**Figure S3.** Pore size distribution analysis of the nanofibrous membranes: (a) PW NFs,

(b) HB NFs and (c) LS NFs. Mean pore size and minimum pore size of various nanofibrous membranes and its corresponding porosity: (d) PW NFs, (e) HB NFs and (f) LS NFs.

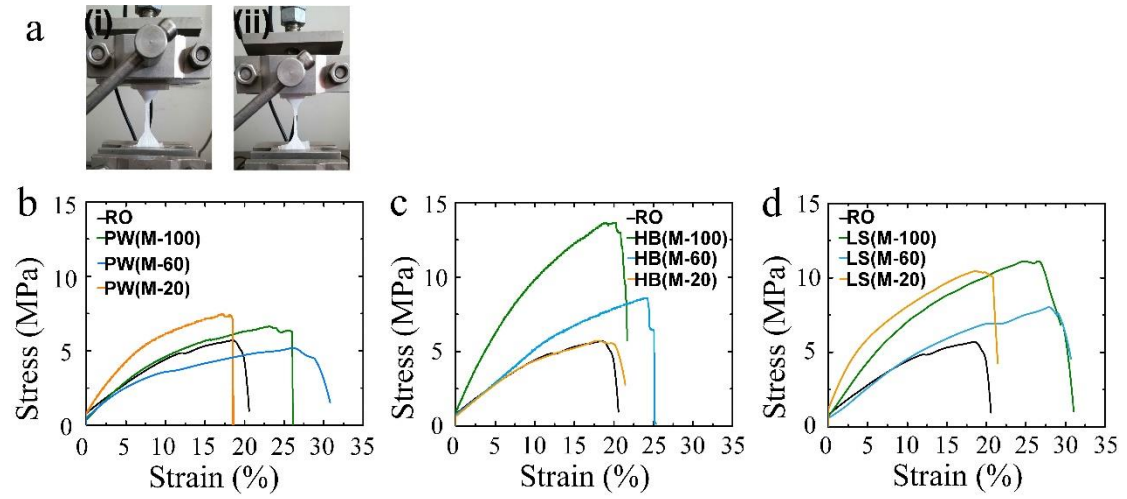

**Figure S4.** Tensile stress-strain curves of three patterned nanofibrous membranes with different mesh number.

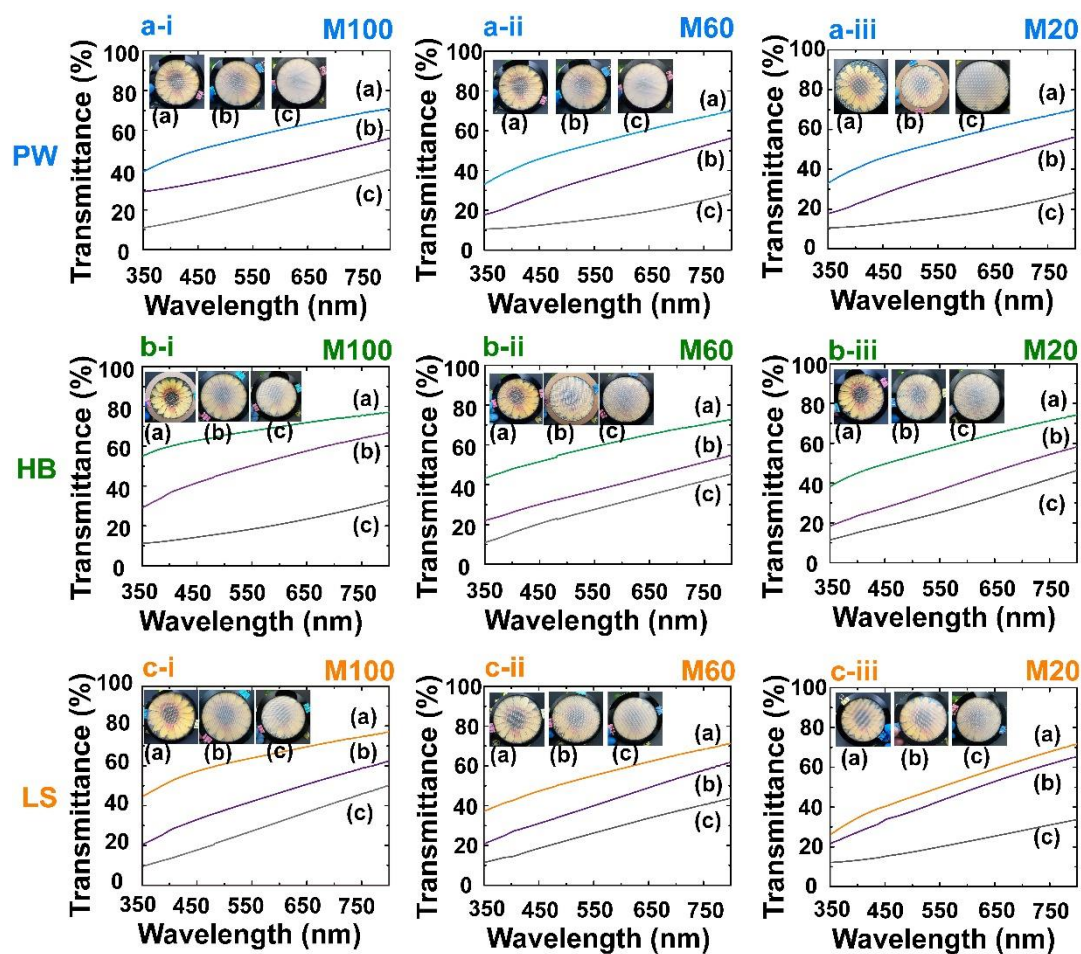

**Figure S5.** Light transmittance in the range of visible light wavelength of various patterned nanofibrous membranes with different thickness: (a) 4  $\mu\text{m}$ ; (b) 8  $\mu\text{m}$ ; (c) 16  $\mu\text{m}$ .



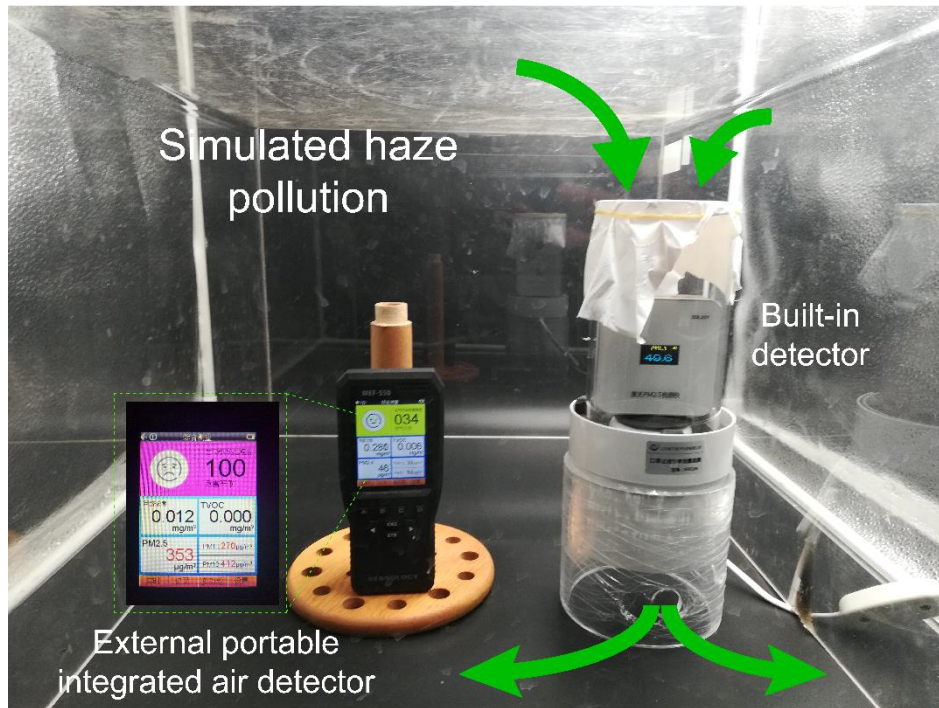

**Figure S6.** Equipment of PM<sub>2.5</sub> purification efficiency measurement under simulated haze pollution.
